# Supplementary material for: Molecular insights into the improved clinical performance of PEGylated interferon therapeutics: a molecular dynamics perspective
Source: Royal Society of Chemistry journal article supplement (doi:10.1039/c7ra12480e), 2018-01-01
Supplement: c7ra12480e1.pdf [file c7ra12480e1.pdf]

## Supplemental Information

### Principal Component Analysis (PCA) of MD Simulations

The following PCA plots demonstrate that the conformational space sampled in the apo-IFN and PEG-IFN simulations during 3 independent runs is highly consistent and reproducible.

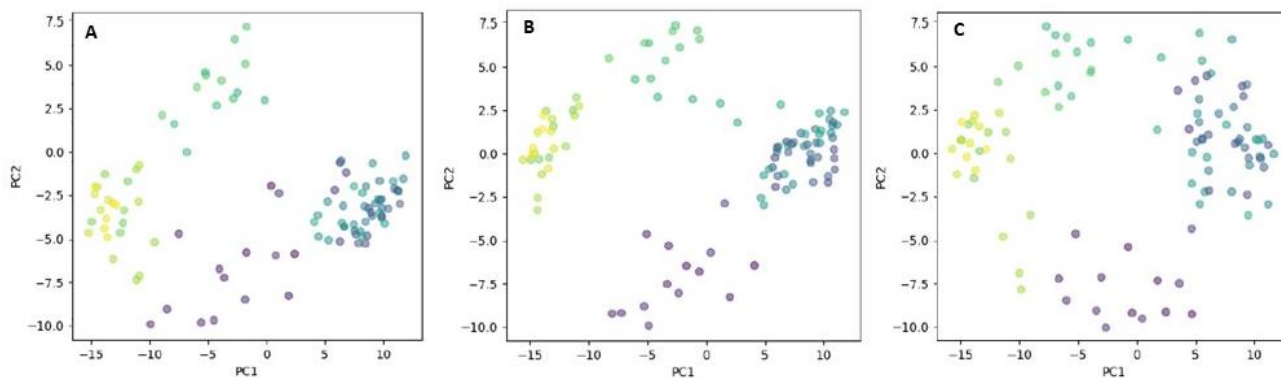

Figure S1. PCA plots of apo-IFN simulations.

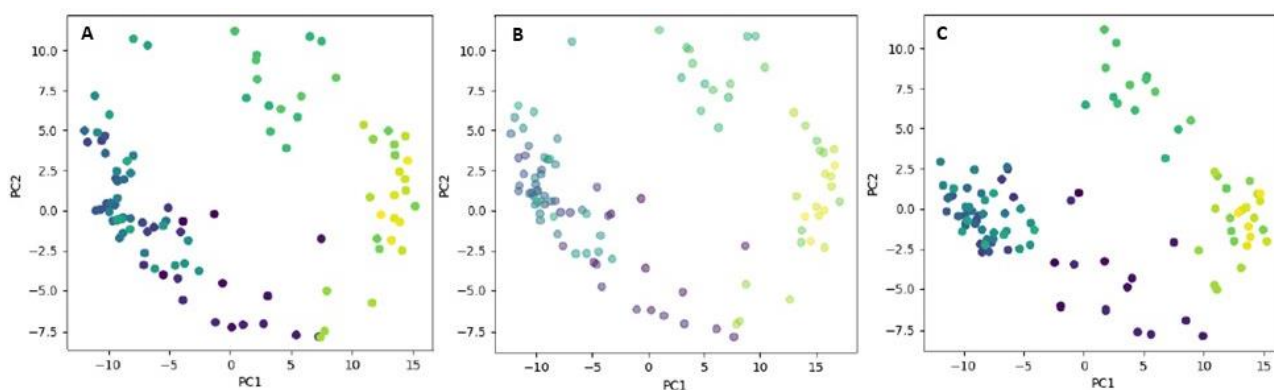

Figure S2. PCA plots of PEG200-IFN simulations.
